# Supplementary material
Source: Research Square preprint supplement (doi:10.21203/rs.3.rs-8930203/v1)
Supplement: Supplementary file 1 [file 8d723dca1c2079ab6c2961e9.docx]

The following Supporting Information is available for this article:


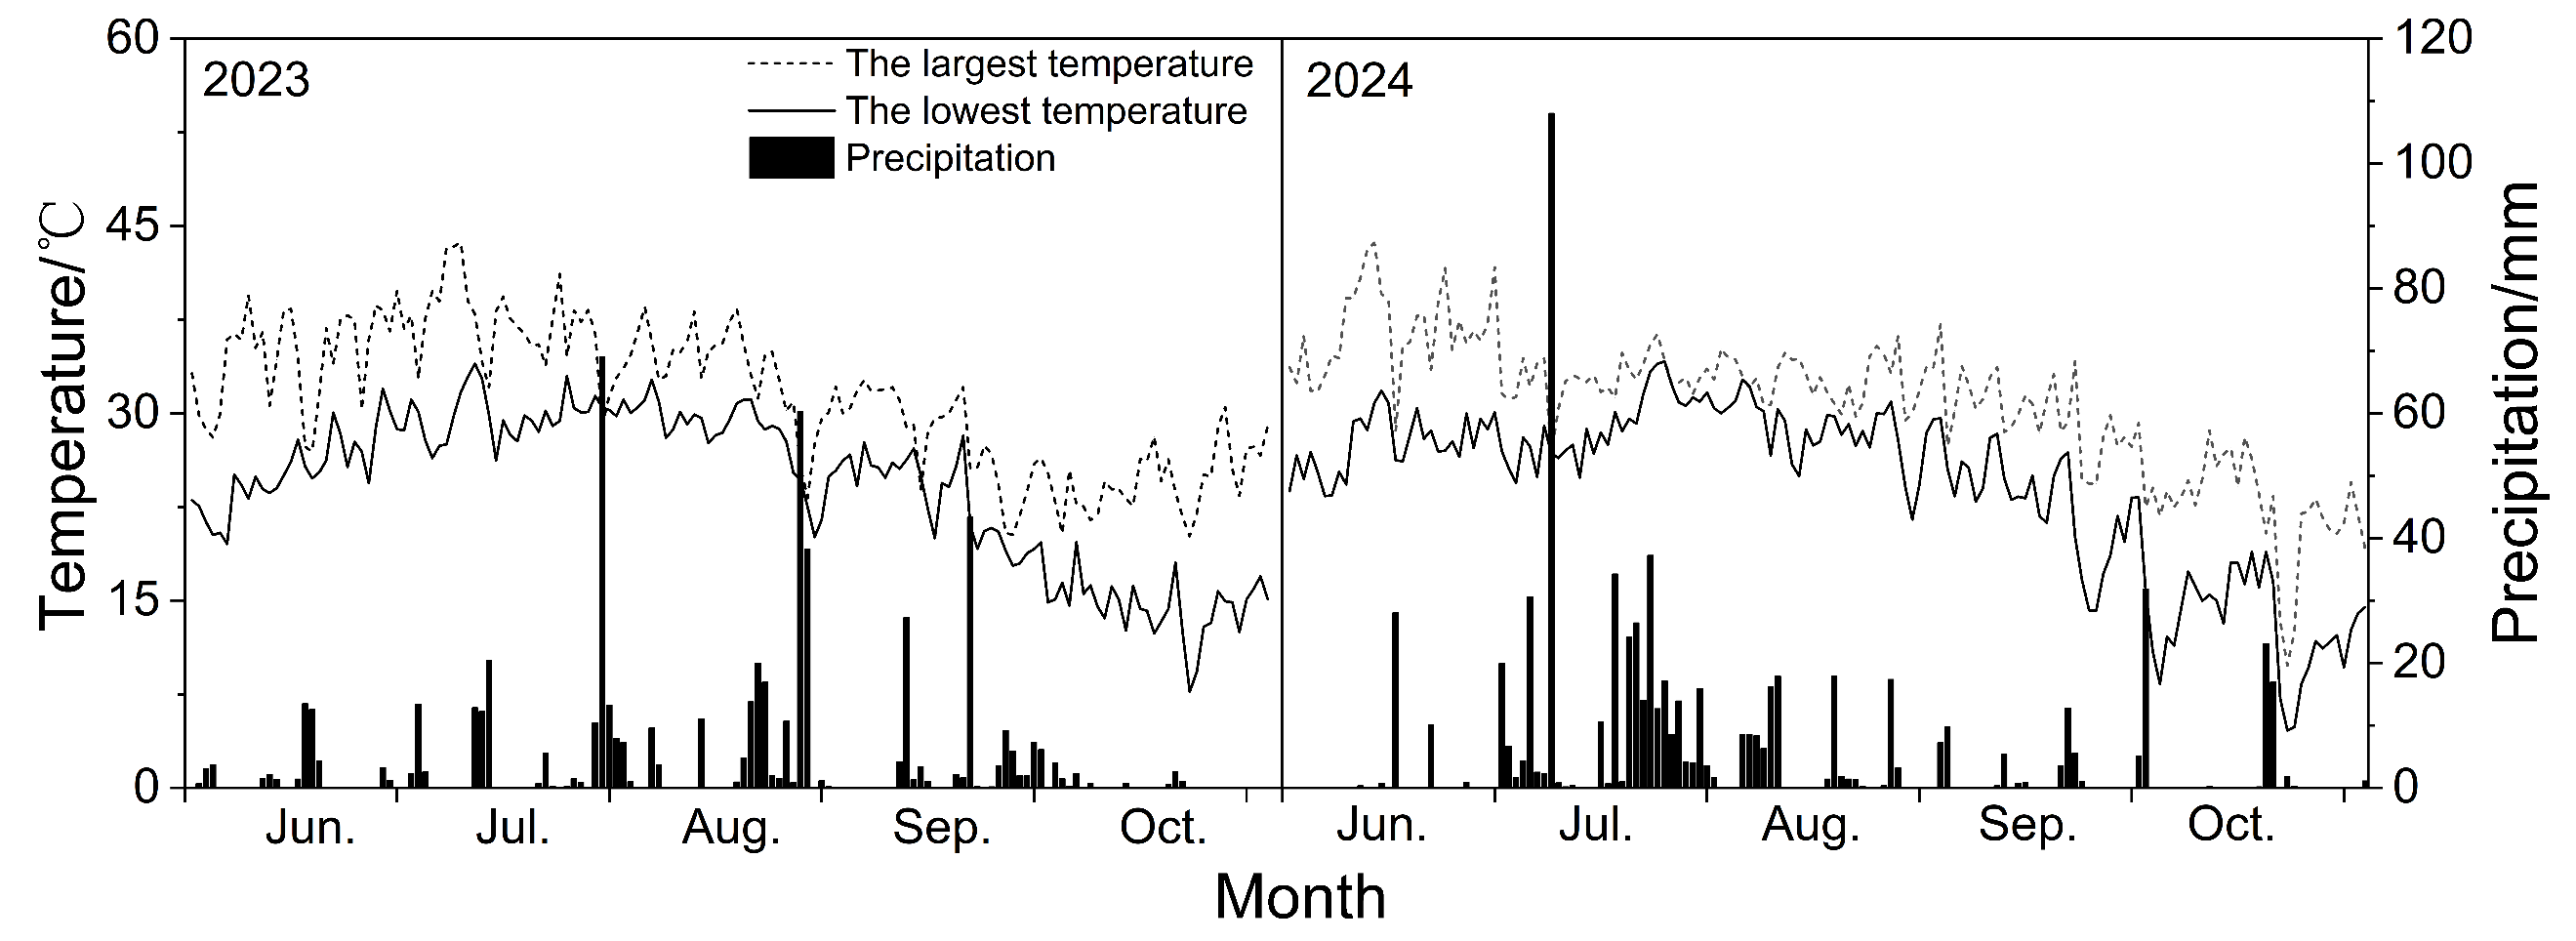


**Fig. S1** Temperature and precipitation during the maize growing season in 2023 and 2024.


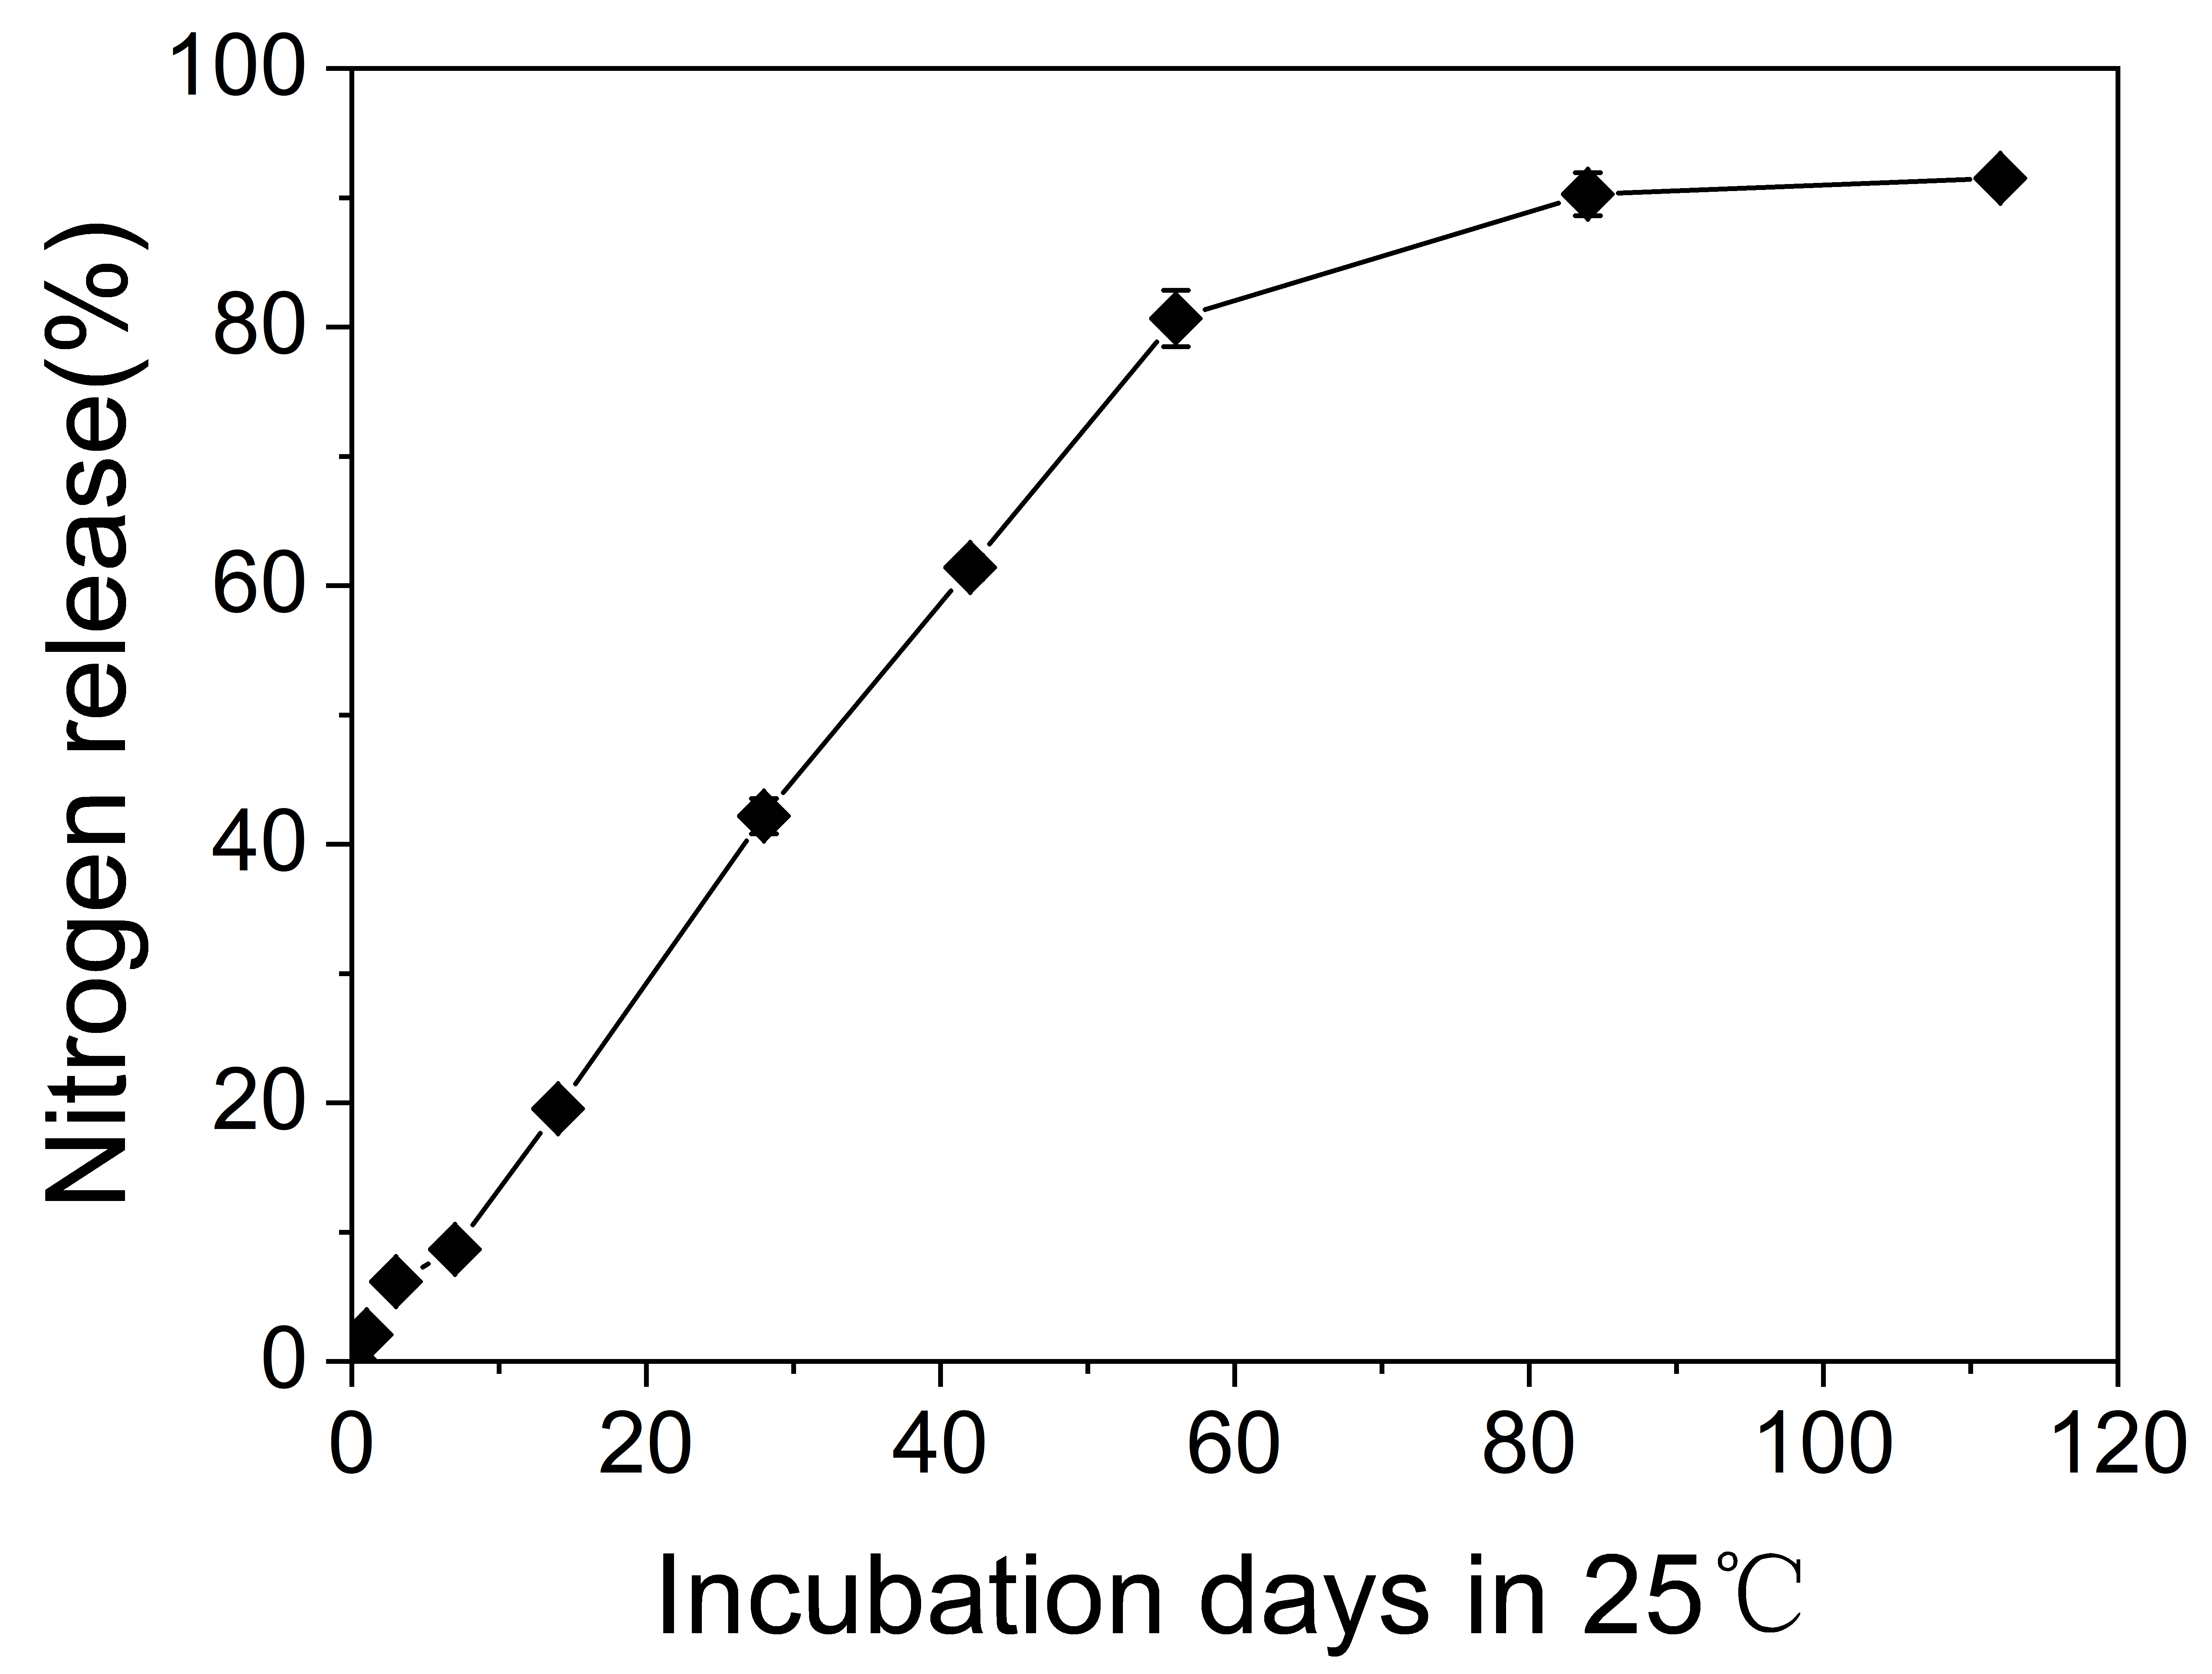


**Fig. S2** Release of CRU cumulatively and per time interval in laboratory water (25℃).


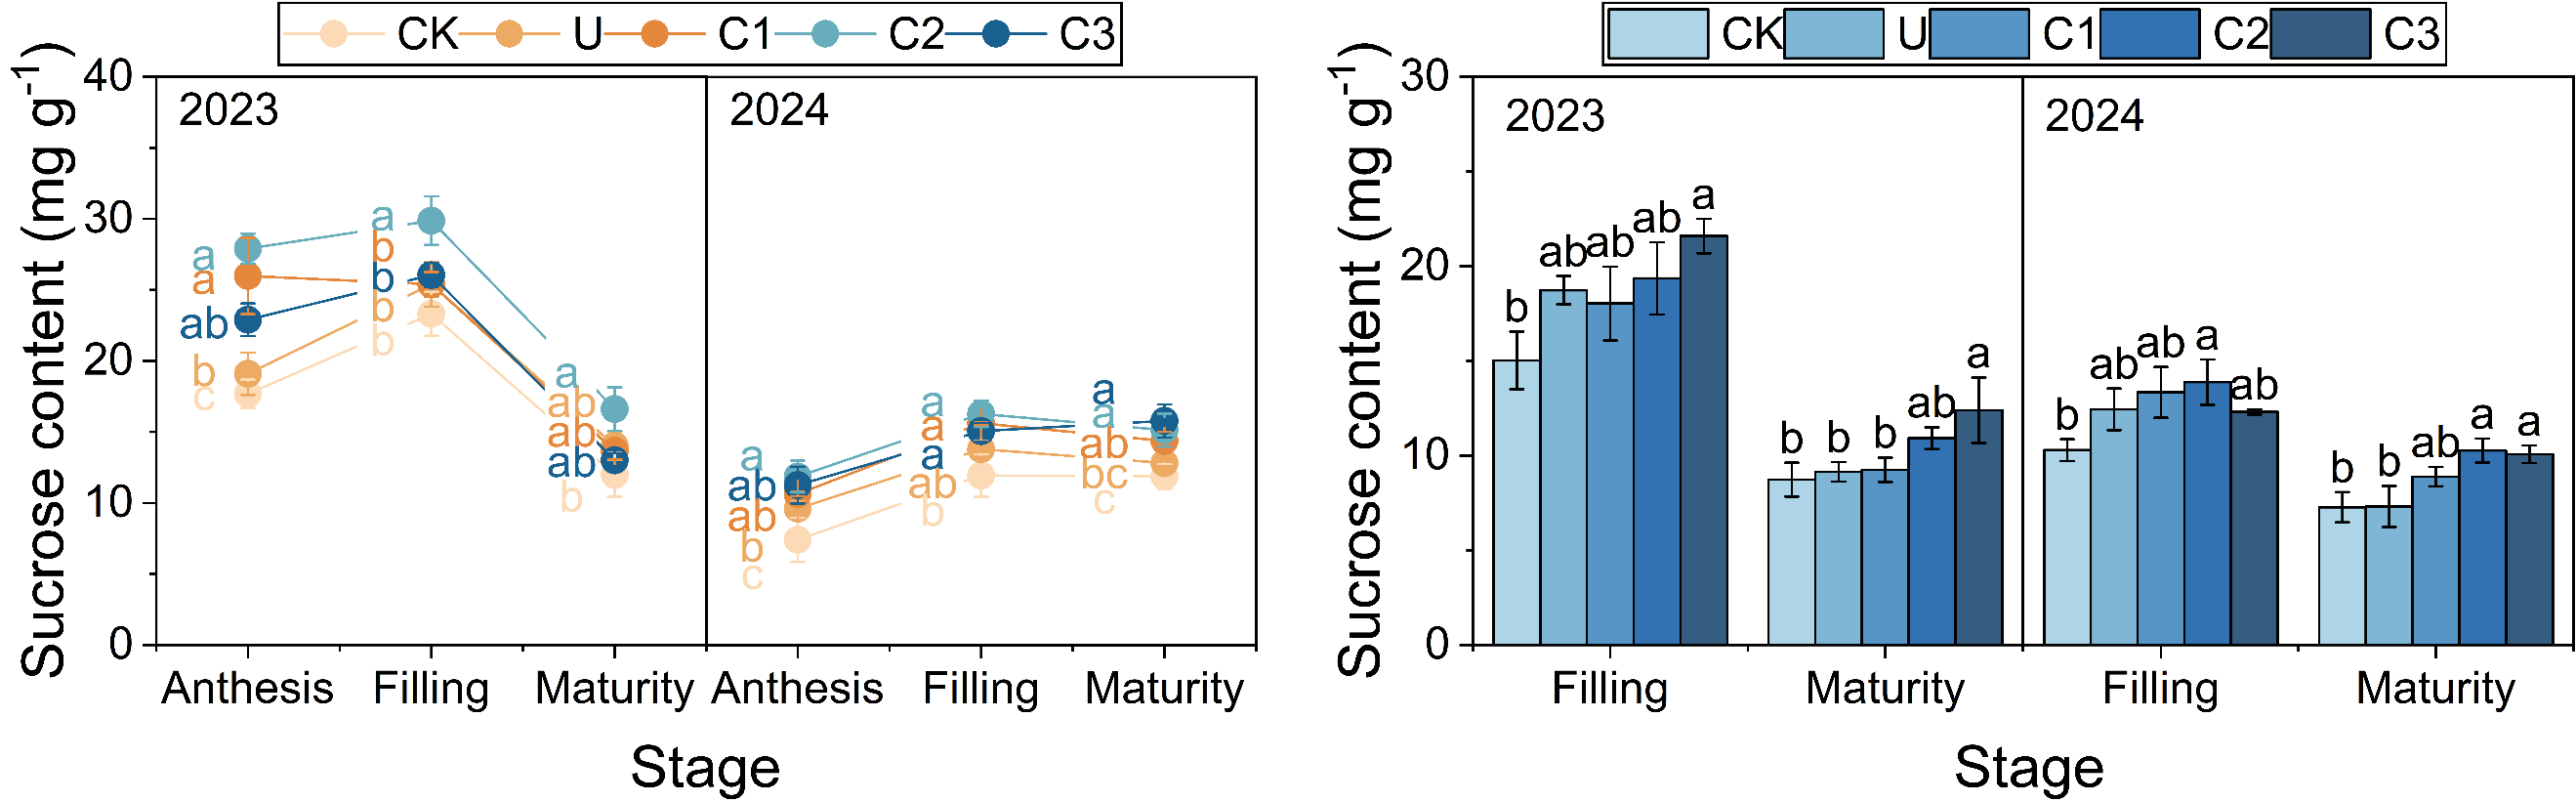


**Fig. S3** Responses of the sourse content of the maize leaves and grains to nitrogen application in 2023 and 2024. Leaves are shown in line charts and grains in bar charts. CK, no fertilisation; U, all Urea-N; C1, CRU-N: Urea-N=1:2; C2, CRU-N: Urea-N=2:1; C3, all CRU-N. Error bars represent SE. Values with different letters are significantly different at *p* < 0.05 within the same parameter.


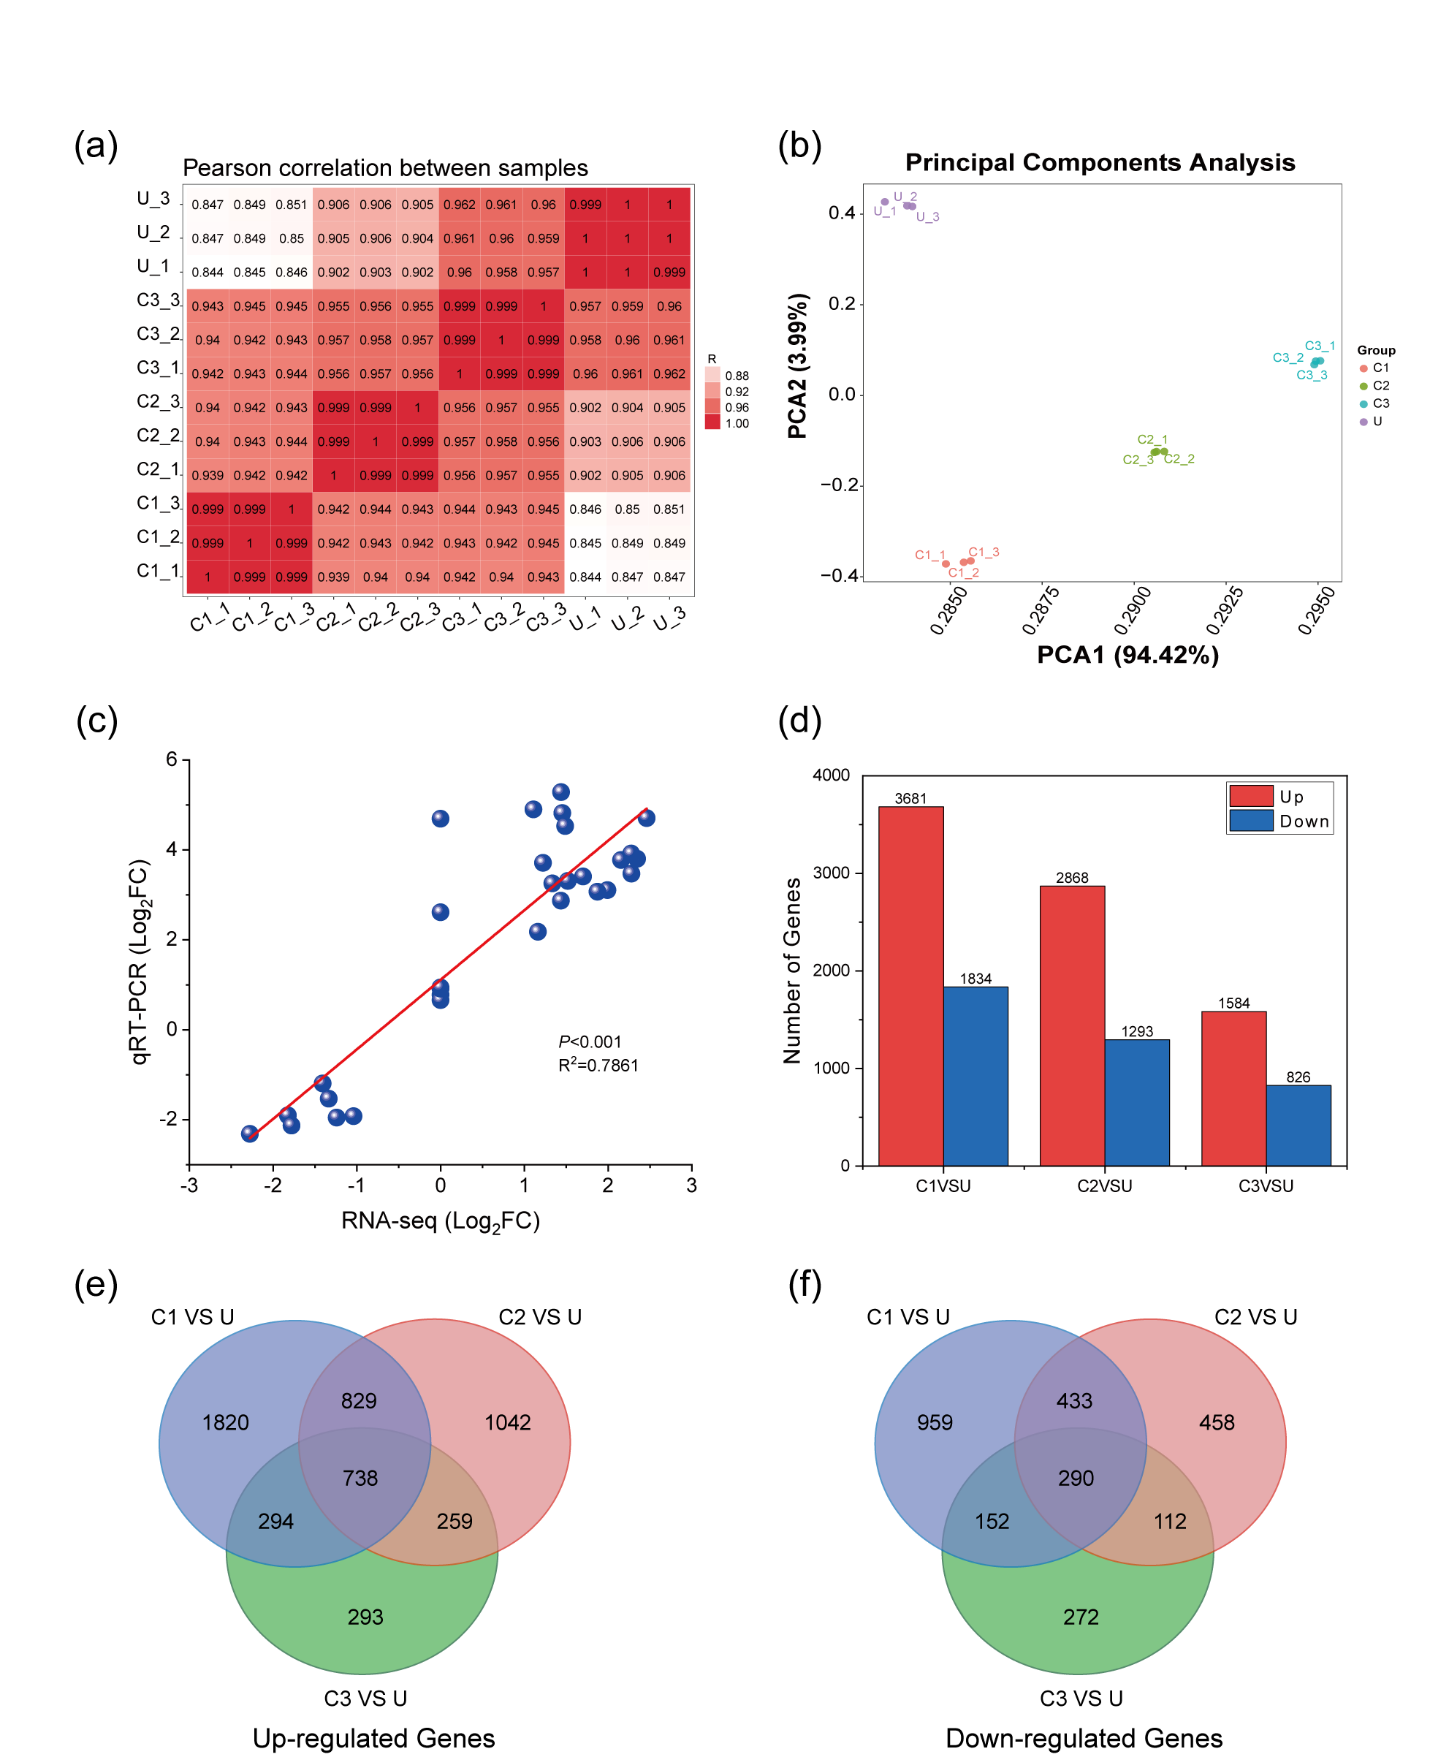


**Fig. S4** Overview and verification of RNA-seq data. (a) Pearson correlation coefficient diagram. (b) PCA based on the dataset of fragments per kilobase exon per million reads mapped. (c) Correlation between RNA-seq and qRT-PCR data. Each RNA-seq expression data was plotted against qRT-PCR data and fitted into a linear regression. (d-f) Up-regulated and down-regulated gene numbers of maize leaves in the different treatments. U, all Urea-N; C1, CRU-N: Urea-N=1:2; C2, CRU-N: Urea-N=2:1; C3, all CRU-N.


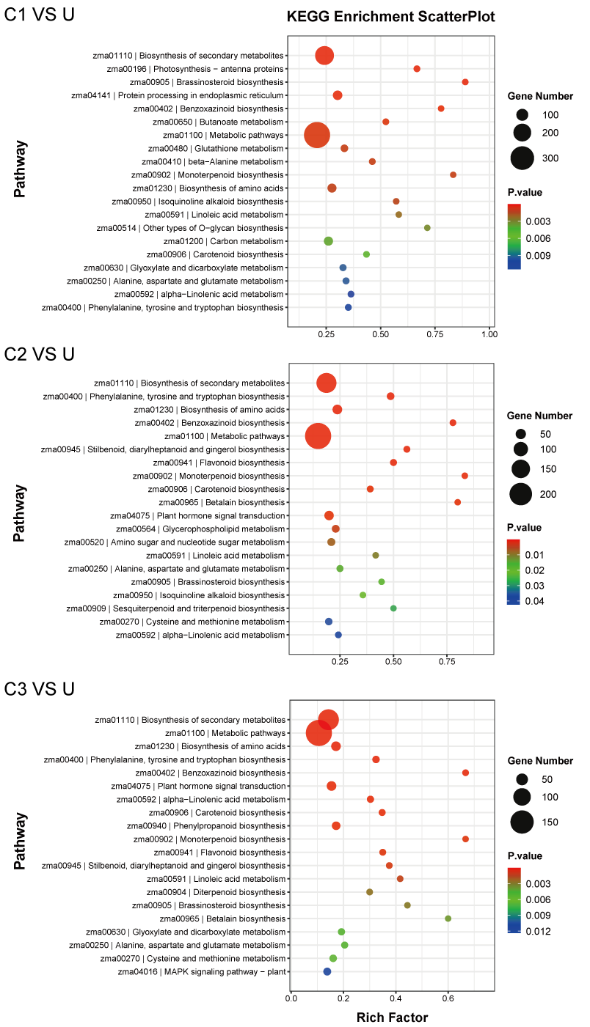


**Fig. S5** KEGG enrichment analysis was performed on differentially expressed genes (DEGs) in maize leaves under various fertilizer conditions. The size and color of the bubbles represent the number of genes and Q value enriched in each pathway, respectively. The rich factor indicates the ratio of DEGs mapped to a specific pathway to the total number of genes mapped to that pathway. U, all Urea-N; C1, CRU-N: Urea-N=1:2; C2, CRU-N: Urea-N=2:1; C3, all CRU-N.


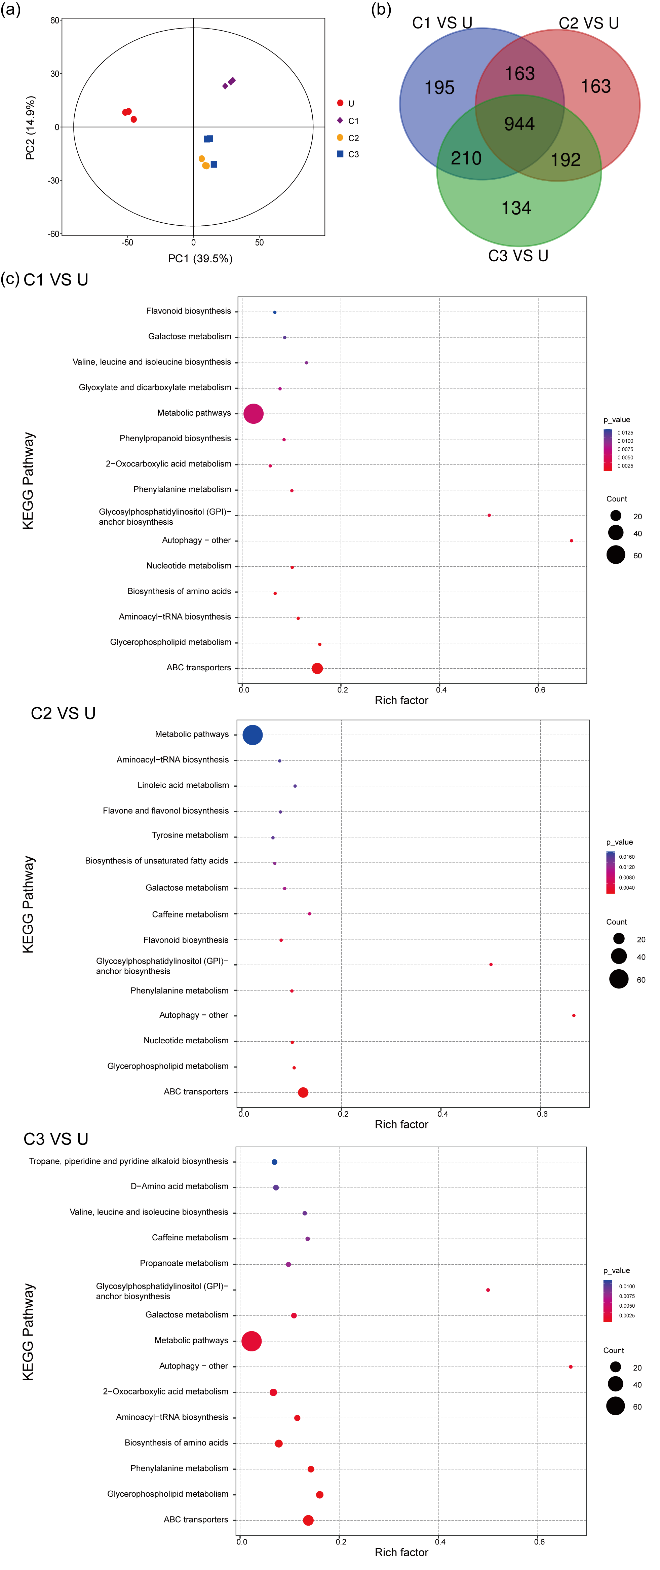


**Fig. S6** Principal component analysis (PCA)(a), Venn diagram of metabolites(b) and KEGG pathway analysis(c) in maize leaves under various fertilizer conditions. U, all Urea-N; C1, CRU-N: Urea-N=1:2; C2, CRU-N: Urea-N=2:1; C3, all CRU-N.

**
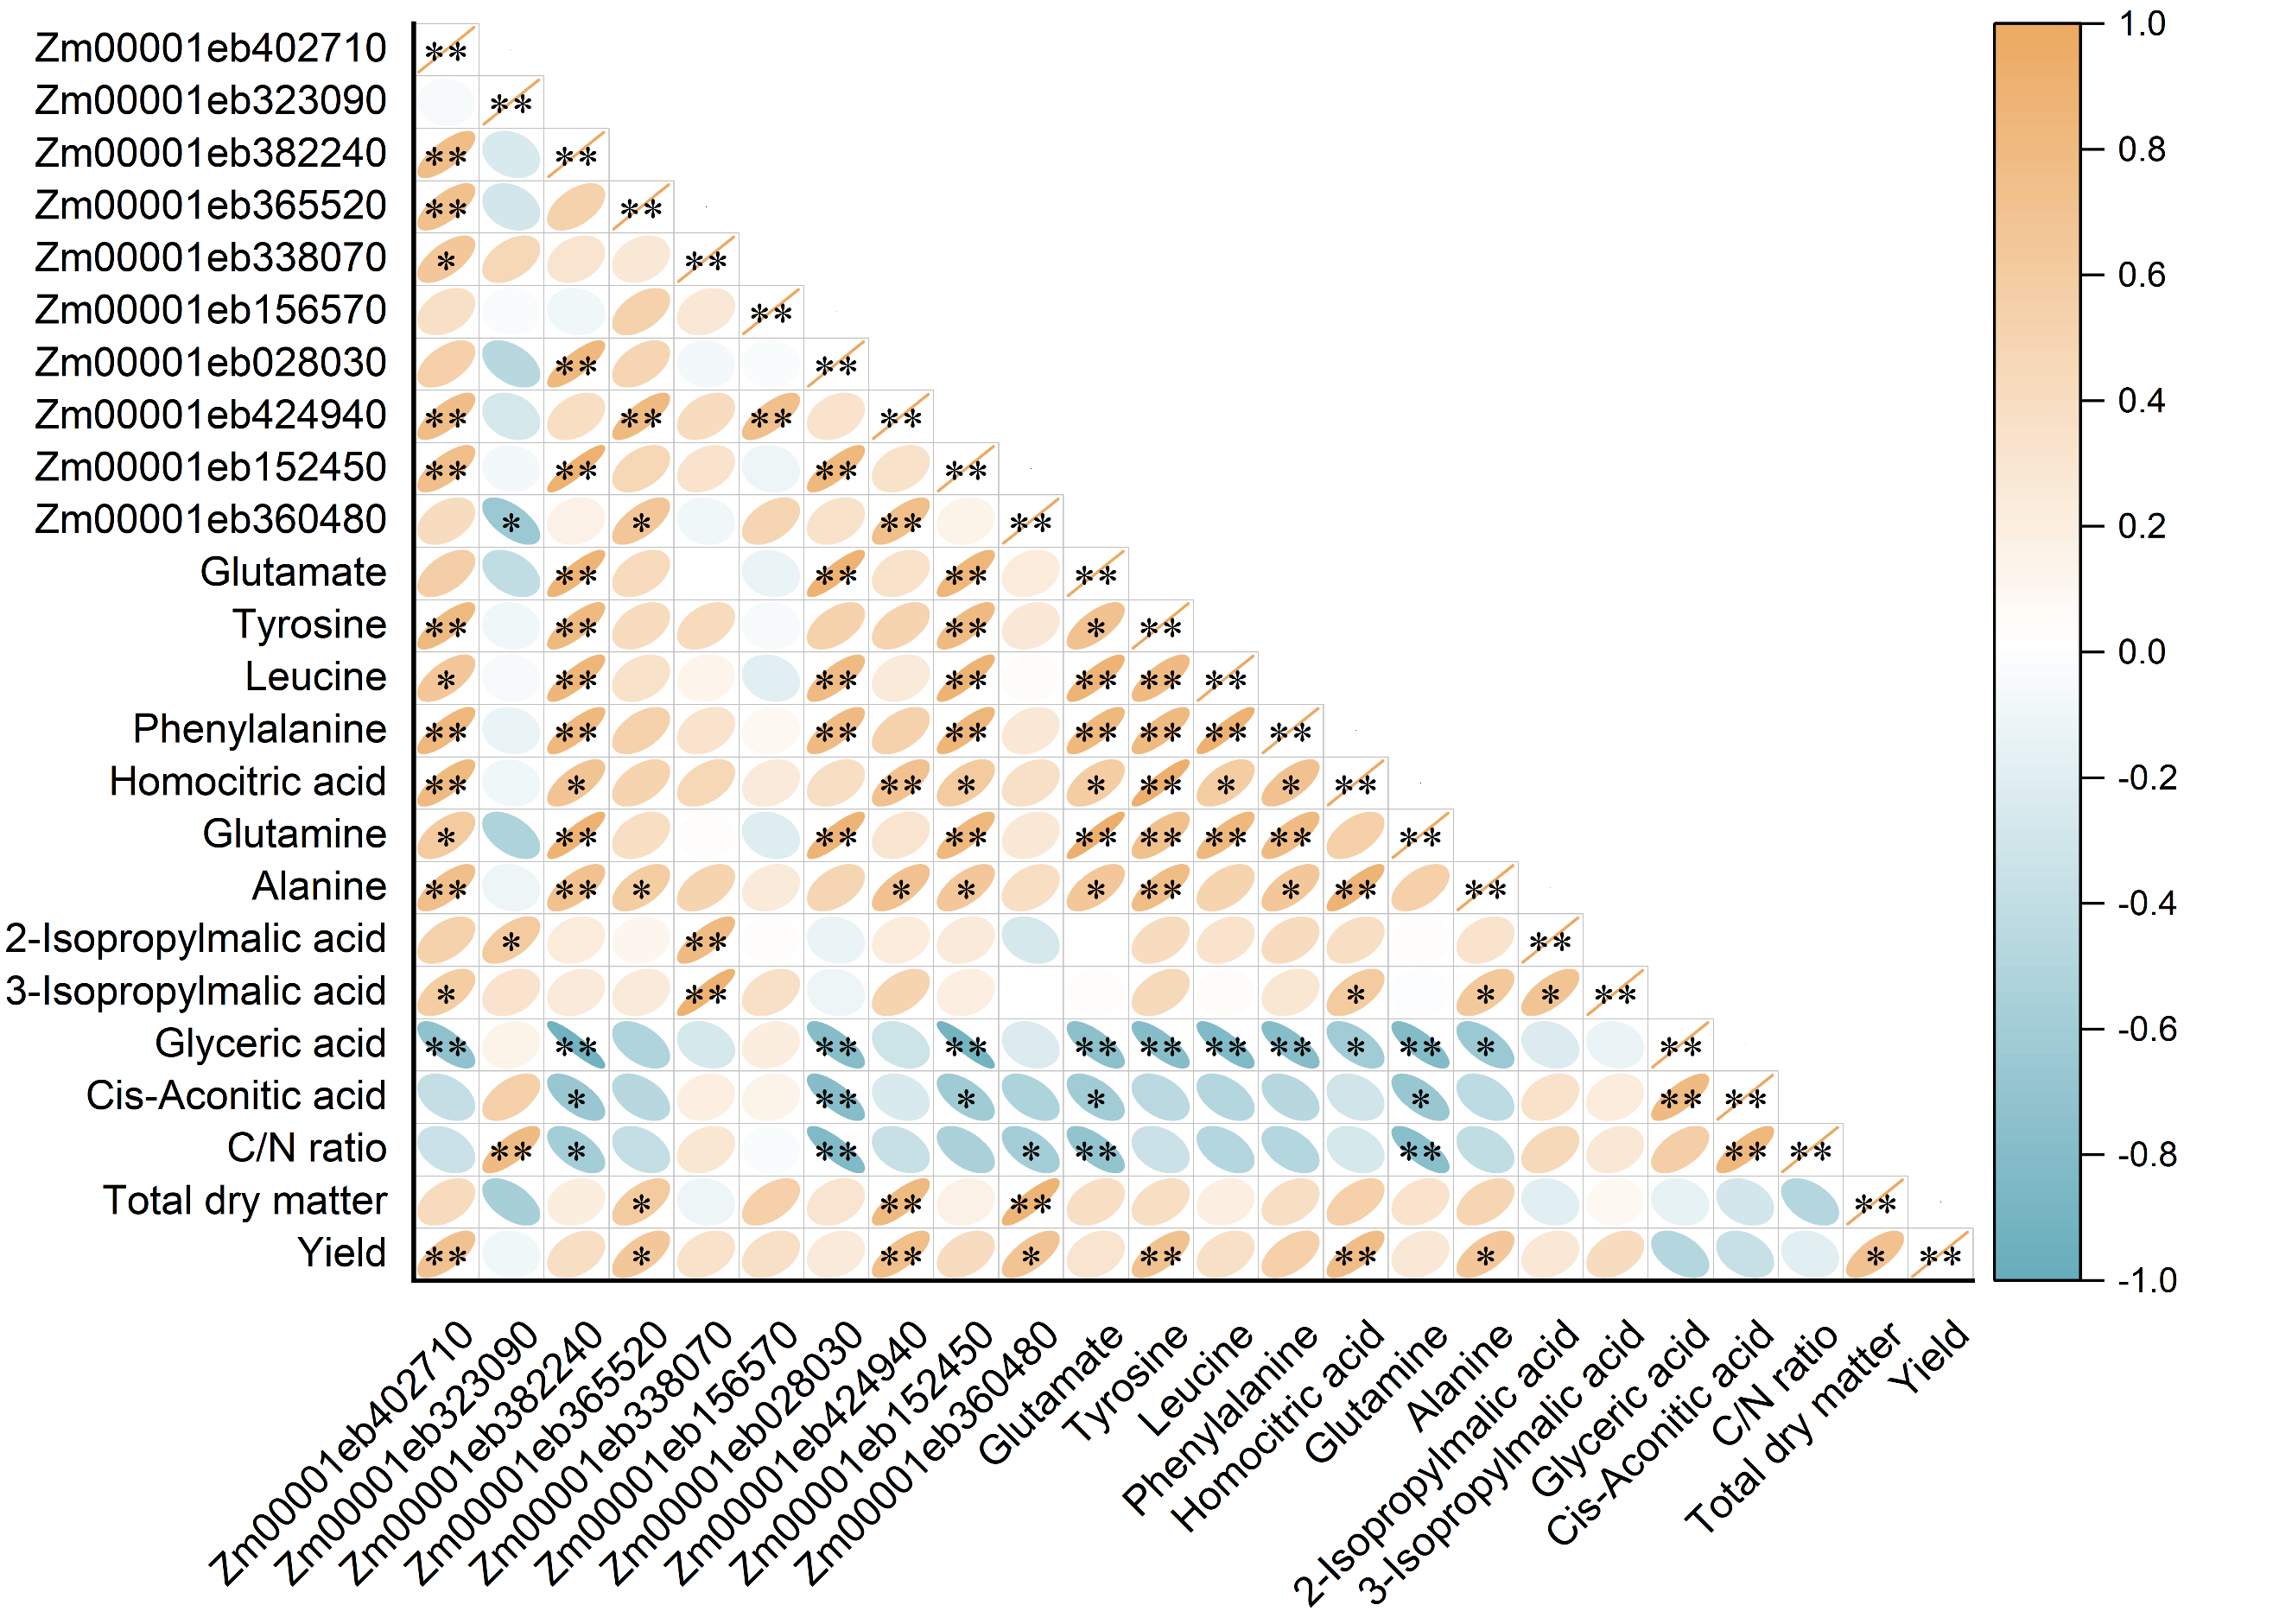
Fig. S7** Spearman correlation of key differentially expressed genes and metabolites in leaves at the filling stage with C/N ratio, dry matter, and yield (* *p* < 0.05; ** *p* < 0.01).


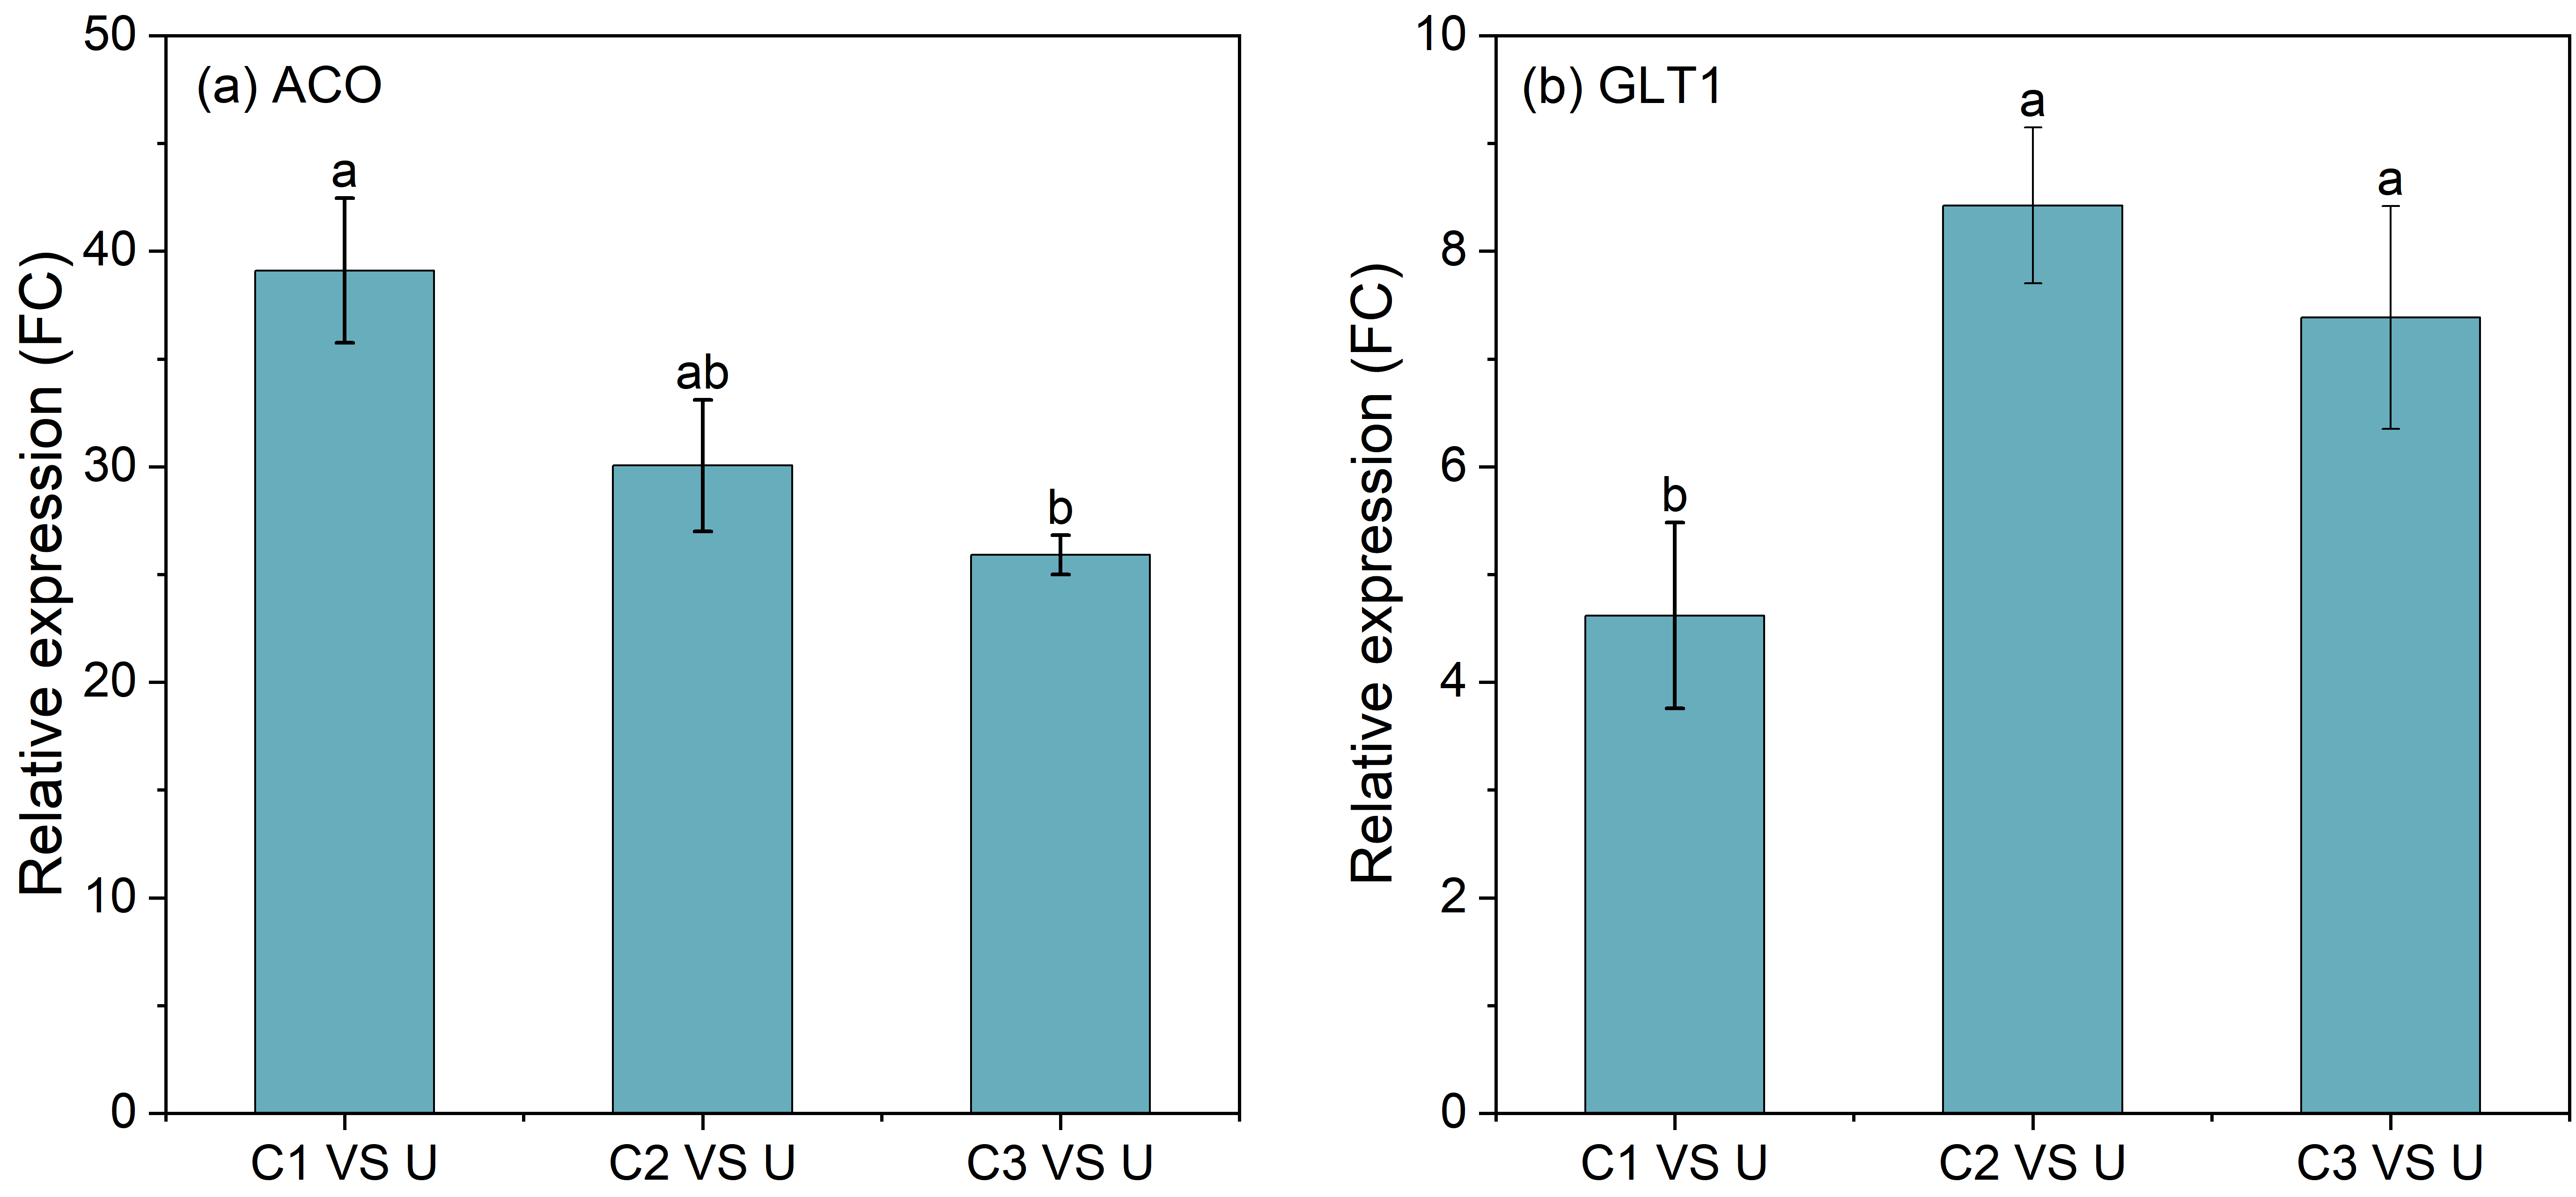


**Fig. S8** Relative expression of ACO (a) and GLT1 (b) in response to nitrogen fertilizer treatments versus control (U), measured by qPCR. CK, no fertilisation; U, all Urea-N; C1, CRU-N: Urea-N=1:2; C2, CRU-N: Urea-N=2:1; C3, all CRU-N. Error bars represent SE. Values with different letters are significantly different at *p* < 0.05 within the same parameter.

**Table S1** Agronomic planting details of maize in 2023 and 2024.

| Year | Planting Date | Top-dressing Date | Harvest Date |
| --- | --- | --- | --- |
| 2023 | Jun. 15th | Jul. 5th | Sep. 22th |
| 2024 | Jun. 14th | Jul. 10th | Sep. 23th |

**Table S2 The primers of candidate genes in the RT-PCR.**

| Gene_id | Forward primer | Reverse primer |
| --- | --- | --- |
| Zm00001eb054990 | CTTTGCCCTCGGGCCATCTT | AGCAGTCGCACATGACCAGT |
| Zm00001eb360480 | GTGAGTGGTGACTGGTGGGT | GTGTTGTGGATTGGTGTGGG |
| Zm00001eb152450 | TGACAGTGCCTATCAAGGCT | AATGCTCAAAGCGCCAACAC |
| Zm00001eb309260 | TCGCACCTACGAGAAGAACG | GCAGAGCAGAGGGCAGTTTA |
| Zm00001eb028030 | CGGCTTGTACGCAATCCTT | ACTCACATTTCAAGACCTTGGGG |
| Zm00001eb402710 | ATTCGACACTGAGGTGGAGC | TCACCGCATCGCAATCATCT |
| Zm00001eb184000 | GGGTGACAGCAGGTCTAGCA | CCGGGGAAGAAACACAACTCT |
| Zm00001eb390590 | TAGCAGCTTGCTGAAAGCACA | ACTCGCATATGATGGTGATGATGA |
| Zm00001eb200910 | CCGCCATCTCACAGGAAAAT | AGGATGCCCTCGAACATCAC |
| Zm00001eb364620 | AGGTCGCCGACGAAGG | CTCCAGCTCCAGCTGCTTC |

**Table S3** Dry matter translocation (DMT), dry matter translocation efficiency (DMTE) and contribution of dry matter to grain (CDMG)are calculated as follows:

| Dry matter translocation (DMT) (kg ha-1) = dry matter at anthesis – dry matter at maturity (all vegetative parts except grain) |
| --- |
| Dry matter translocation efficiency (DMTE) (%) = dry matter translocation / dry matter at anthesis × 100 |
| Contribution of pre-anthesis dry matter to grain (CDMG) (%) = dry matter translocation / grain yield at maturity × 100 |

**Table S4** NCBI submission metadata

| Sample Name | BioProject | BioSample | Accession |
| --- | --- | --- | --- |
| leaf U_1 | PRJNA1196689 | SAMN45631952 | SRR31690063 |
| leaf U_2 | PRJNA1196689 | SAMN45631953 | SRR31690062 |
| leaf U_3 | PRJNA1196689 | SAMN45631954 | SRR31690061 |
| leaf C1_1 | PRJNA1196689 | SAMN45631947 | SRR31690070 |
| leaf C1_2 | PRJNA1196689 | SAMN45631957 | SRR31690068 |
| leaf C1_3 | PRJNA1196689 | SAMN45631955 | SRR31690060 |
| leaf C2_1 | PRJNA1196689 | SAMN45631956 | SRR31690059 |
| leaf C2_2 | PRJNA1196689 | SAMN45631951 | SRR31690064 |
| leaf C2_3 | PRJNA1196689 | SAMN45631949 | SRR31690066 |
| leaf C3_1 | PRJNA1196689 | SAMN45631950 | SRR31690065 |
| leaf C3_2 | PRJNA1196689 | SAMN45631948 | SRR31690069 |
| leaf C3_3 | PRJNA1196689 | SAMN45631958 | SRR31690067 |

**Table S5** Effects of different nitrogen treatments on total aboveground biomass at anthesis, filling and mature stage, dry matter translocation (DMT), dry matter translocation efficiency (DMTE), contribution of dry matter to grain (CDMG) in 2023 and 2024.

| Year | Treatment | Total aboveground biomass | | | All vegetative parts biomass | | |
| --- | --- | --- | --- | --- | --- | --- | --- |
| Anthesis (t ha-1) | Filling (t ha-1) | Mature (t ha-1) | DMT(t ha-1) | DMTE(%) | CDMG(%) |
| 2023 | CK | 6.80±0.12c | 15.19±0.18d | 15.24±0.32d | 1.02±0.04c | 13.14±0.28d | 12.07±0.68d |
| U | 9.39±0.24b | 16.75±0.34c | 17.93±0.51c | 1.28±0.11bc | 13.70±0.50c | 13.42±0.16c |
| C1 | 9.87±0.25ab | 18.32±0.61b | 19.74±0.76bc | 1.45±0.13ab | 15.02±0.69b | 13.92±0.43bc |
| C2 | 10.39±0.27 a | 19.74±0.14a | 21.43±0.68ab | 1.68±0.02a | 16.79±0.31a | 14.26±0.99ab |
| C3 | 10.45±0.27a | 19.04±0.27ab | 22.18±0.49a | 1.59±0.09a | 16.41±0.87ab | 13.83±0.23a |
| 2024 | CK | 5.32±0.09c | 10.71±0.5c | 13.71±0.58c | 0.7±0.05c | 13.09±0.99c | 9.55±0.52c |
| U | 8.11±0.27b | 13.83±0.48b | 17.42±0.39b | 1.54±0.07b | 18.35±0.10b | 14.56±0.44b |
| C1 | 9.37±0.14a | 14.89±0.26ab | 19.56±0.96ab | 1.61±0.12ab | 18.91±0.29ab | 14.60±0.41ab |
| C2 | 10.12±0.33a | 15.53±0.21a | 20.84±0.73a | 1.85±0.21ab | 19.27±0.85a | 15.41±0.70a |
| C3 | 10.26±0.62a | 15.84±0.18a | 20.75±1.21a | 2.05±0.21a | 19.95±0.50a | 17.17±0.18a |
| Year (Y) | | ** | ** | ** | * | * | ** |
| Nitrogen（N） | | ** | ** | ** | ** | ** | ** |
| Y*N | | ns | * | * | ns | * | ** |

Notes: CK, no fertilization; U, all Urea-N; C1, CRU-N: Urea-N=1:2; C2, CRU-N: Urea-N=2:1; C3, all CRU-N. Values with the different letter are significantly different at *P* < 0.05 within the same parameter. * and ** represent *p*<0.05 and *p*<0.01 respectively. Values are means ±SE (n=3).

**Table S6** Transcription quality inspection.

| Sample | Raw Data | | Valid Data | | Valid Ratio(reads) | Q20% | Q30% | GC content% |
| --- | --- | --- | --- | --- | --- | --- | --- | --- |
| Read | Base | Read | Base |
| C1_1 | 45853924 | 6.88G | 42664428 | 6.40G | 93.04 | 99.61 | 97.58 | 50.50 |
| C1_2 | 45469806 | 6.82G | 42412644 | 6.36G | 93.28 | 99.67 | 97.75 | 50.50 |
| C1_3 | 47066764 | 7.06G | 43574054 | 6.54G | 92.58 | 99.64 | 97.64 | 50.50 |
| C2_1 | 48935692 | 7.34G | 45663916 | 6.85G | 93.31 | 99.66 | 97.67 | 50.50 |
| C2_2 | 48472366 | 7.27G | 44835806 | 6.73G | 92.50 | 99.65 | 97.69 | 50.50 |
| C2_3 | 45889020 | 6.88G | 41917960 | 6.29G | 91.35 | 99.64 | 97.62 | 50.50 |
| C3_1 | 46441314 | 6.97G | 43735630 | 6.56G | 94.17 | 99.67 | 97.66 | 51.50 |
| C3_2 | 46299378 | 6.94G | 43596464 | 6.54G | 94.16 | 99.68 | 97.64 | 51.50 |
| C3_3 | 38587442 | 5.79G | 36177278 | 5.43G | 93.75 | 99.64 | 97.46 | 51.50 |
| U_1 | 53972532 | 8.10G | 50025430 | 7.50G | 92.69 | 99.63 | 97.68 | 51.50 |
| U_2 | 45741704 | 6.86G | 42463628 | 6.37G | 92.83 | 99.62 | 97.54 | 51.50 |
| U_3 | 52314270 | 7.85G | 48731746 | 7.31G | 93.15 | 99.65 | 97.70 | 51.50 |
